# Supplementary material
Source: HighWire-hosted journal article supplement (https://erj.ersjournals.com/highwire/filestream/114710/field_highwire_adjunct_files/0/ERJ-00021-2015_Supplement.pdf)
Supplement: ERJ-00021-2015_Supplement.pdf [file ERJ-00021-2015_Supplement.pdf]

## **Increased alveolar soluble Annexin V promotes lung inflammation and fibrosis**

### **Supplemental data - Materials and methods**

**Human BALF.** Bronchoalveolar Lavage (BALF) was performed at the National Institute of Respiratory Diseases (INER), Mexico City, Mexico, as approved by the Ethics Committee at INER. It is performed through flexible fiberoptic bronchoscopy under local anesthesia. Briefly, 200 ml of normal saline is instilled in 50-ml aliquots, with an average recovery of 60%–70%. The cells are pelleted from the BALF, and the cell-free supernatant is frozen at  $-80^{\circ}\text{C}$ . The control group for Figure 1 included 3 healthy volunteers, and 2 individuals without HRCT-scan evidence of lung disease who required a bronchoscopy for the diagnosis of unexplained cough. In all cases bronchoscopy did not display any abnormality.

**Removal of Annexin V from BALF by immunoprecipitation.** BALF samples with known elevated Annexin V levels were pre-cleared by mixing with  $1\mu\text{g}$  rabbit IgG and  $20\mu\text{l}$  of protein A/G agarose at  $4^{\circ}$  for 30 mins, followed by centrifuging at  $1000g$  for 30s at  $4^{\circ}\text{C}$ . The supernatants were removed to clean tubes and incubated with mixing for 1h with  $4\mu\text{g}$  rabbit anti-Annexin V antibody or  $4\mu\text{g}$  rabbit IgG, then  $20\mu\text{l}$  of protein A/G agarose was added and the tubes were incubated with mixing for 1h at  $4^{\circ}\text{C}$ . The tubes were centrifuged for 30s at  $1000g$ , and the supernatant carefully removed. PBS washes of the immunoprecipitate were pooled with the supernatant. Successful reduction of Annexin V levels was confirmed by ELISA.

**Intra-tracheal instillation of Annexin V solution.** 8 week C57 female black mice were anaesthetized with isoflurane and suspended at a  $45\text{-}60^{\circ}\text{C}$  angle on an intubation platform. The oropharynx and larynx were visualized with a small animal laryngoscope (LS-2; Penn-Century), and  $150\mu\text{l}$  of Annexin V or vehicle (20mM phosphate buffer, 0.02% Tween 80, 130 mM arginine HCl), both diluted in PBS, was then aerosolized and delivered into the airway using a microsyringe tip which was inserted past the vocal cords and into the trachea. The tip was left inside the trachea for a few seconds, then the mouse was taken off the support platform and laid supine on a heating source until the effects of anaesthesia wore off. To mimic a limited chronic exposure, Annexin V was administered to mice twice a week for 2 weeks. The  $150\mu\text{l}$  aerosol administered to each mouse contained  $< 0.006$  EU, 4% of the maximum acceptable endotoxin that can be administered to a 30g mouse (20).

**Quantitation of soluble collagen in conditioned medium.** Collagen was precipitated from cell-conditioned medium, medium alone, or collagen standards assayed in parallel, by 30 min treatment with 0.1% Sirius Red in saturated picric acid (1ml dye to  $50\mu\text{l}$  CM). The collagen was pelleted by centrifuging the samples at  $10,000g$ , and the supernatants were carefully discarded. The pellets were

washed with 0.1M HCl to remove unbound dye, and re-centrifuged. The dye was then eluted from the pellets by vigorously vortexing with 0.5M NaOH, then the solutions were transferred to a 96 well plate and the absorbance measured at 540nm in a plate reader. Values were calculated from a standard curve from collagen standards assayed in parallel.

## Supplementary data - Results

### Figure 1. Annexin V does not induce fibroblasts to proliferate

Human fibroblasts (WI38 from ATTC) were plated at a density of  $5 \times 10^4$  cells per  $\text{cm}^2$ , and cultured for  $24\text{h} \pm 50$  ng/ml Annexin V. The cells were then trypsinized, neutralized and counted. Three independent experiments showed no difference in cell counts: untreated:  $9.3 \pm 2.2 \times 10^4$  cells/well versus Annexin-treated  $9.2 \pm 2.4 \times 10^4$  cells/well. These experiments were repeated with embryonic mouse fibroblasts (NIH3T3 from ATTC) and an adult human fibroblast cell line (CCD-8Lu from ATTC), with the same results (not shown).

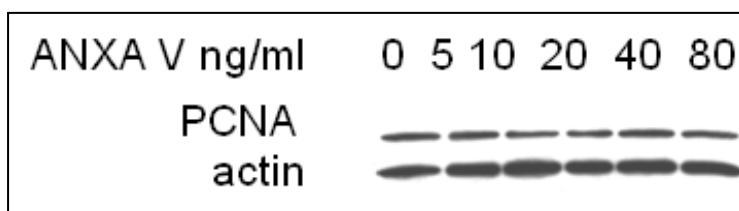

Lysates of WI38 lung fibroblasts that had been treated for 24h with increasing doses of Annexin V, added at the time of plating, were analysed by western blot for PCNA expression,

corrected for actin. PCNA was not induced with Annexin V treatment. Results were similar when embryonic mouse fibroblasts (NIH3T3) or human fibroblast cell line CCD-8Lu were treated as above (not shown).

### Figure 2. CM from Annexin V-treated AEC (MLE15) is less stimulatory to human adult fibroblasts when ErbB2 is silenced in the AEC, as measured by fibroblast cell counts and PCNA.

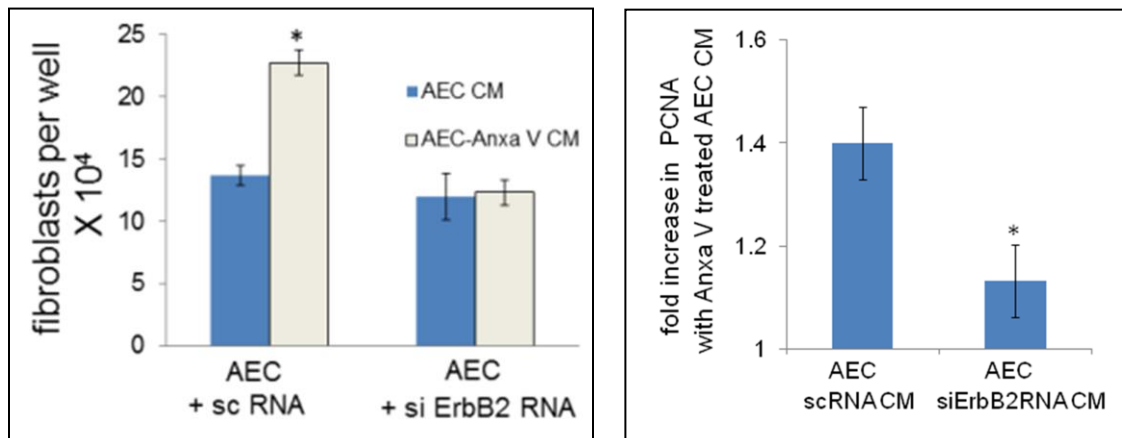

Left panel shows that. Annexin V treatment of AEC in the presence of 10 nM scrambled RNA resulted in CM that induced a 1.7 fold stimulation in fibroblast growth, as measured by fibroblast cell counts

after 24h treatment with the CM ( $P < 0.01$  by ANOVA, followed by Tukey's post hoc test). The Annexin-mediated growth response was abolished when AEC were treated with Annexin V in the presence of 10 nM silencing RNA to ErbB2.

Right panel shows decreased PCNA expression in adult human fibroblasts when treated with CM from ErbB2-silenced, Annexin V treated AEC, versus CM from Annexin V-treated, scrambled RNA treated AEC, as measured by band densitometry, corrected for actin, from 3 western blots,  $P < 0.02$ .

**Figure 3. . ErbB RTK inhibition blocks Annexin V-mediated IP10 release from MLE15 AEC, but not the release of KC and MIP-2**

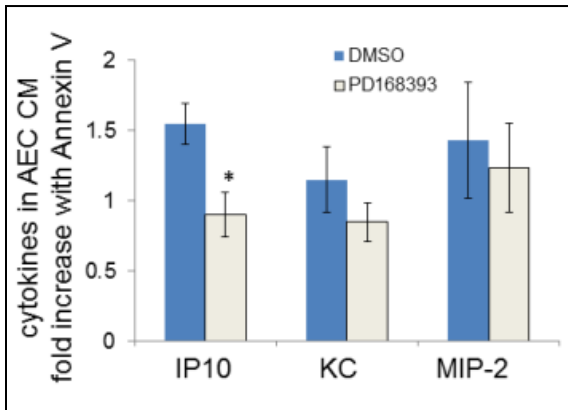

MLE15 AEC were treated for 2h  $\pm$  10 $\mu$ M ErbB tyrosine kinase inhibitor PD168393, then Annexin V, 50 ng/ml, was added for 24h. Cytokine analysis of CM from 3 independent treatments using mouse cytokine protein arrays (R&D, Minneapolis, MN), showed that Annexin V-mediated IP10 secretion was reduced by PD168393,  $p < 0.03$ ,  $n = 3$ , while secretion of the other 2 cytokines induced in AEC2 by Annexin V, KC and MIP2, was not altered.

Table 1. Proteomic screen of epithelial-healing versus pro-fibrotic healing human BALF

| Protein Name                                                                                   | Accession Number | MW      | Human BALF       |                    |                  |
|------------------------------------------------------------------------------------------------|------------------|---------|------------------|--------------------|------------------|
|                                                                                                |                  |         | Protein Grouping | pro-               | pro-             |
|                                                                                                |                  |         |                  | epithelial healing | fibrotic healing |
| 1 Serum albumin OS=Homo sapiens GN=ALB PE=1 SV=2 [MASS=69366]                                  | ALBU_HUMAN       | 69 kDa  |                  | 968                | 778              |
| 2 Serotransferrin OS=Homo sapiens GN=TF PE=1 SV=2 [MASS=77049]                                 | TRFE_HUMAN       | 77 kDa  |                  | 71                 | 75               |
| 3 Ig gamma-1 chain C region OS=Homo sapiens GN=IGHG1 PE=1 SV=1 [MASS=36106]                    | IGHG1_HUMAN      | 36 kDa  | TRUE             | 33                 | 52               |
| 4 Ig kappa chain C region OS=Homo sapiens GN=IGKC PE=1 SV=1 [MASS=11609]                       | IGKC_HUMAN       | 12 kDa  |                  | 30                 | 63               |
| 5 Ig alpha-1 chain C region OS=Homo sapiens GN=IGHA1 PE=1 SV=2 [MASS=37654]                    | IGHA1_HUMAN      | 38 kDa  |                  | 19                 | 32               |
| 6 Ig lambda chain C regions OS=Homo sapiens GN=IGLC1 PE=1 SV=1 [MASS=11236]                    | LAC_HUMAN        | 11 kDa  |                  | 14                 | 30               |
| 7 Alpha-1-antitrypsin OS=Homo sapiens GN=SERPINA1 PE=1 SV=3 [MASS=46736]                       | A1AT_HUMAN       | 47 kDa  |                  | 4                  | 31               |
| 8 Complement C3 OS=Homo sapiens GN=C3 PE=1 SV=2 [MASS=187147]                                  | CO3_HUMAN        | 187 kDa |                  |                    | 26               |
| 9 Polymeric immunoglobulin receptor OS=Homo sapiens GN=PIGR PE=1 SV=4 [MASS=83283]             | PIGR_HUMAN       | 83 kDa  |                  | 30                 | 6                |
| 10 Hemopexin OS=Homo sapiens GN=HPX PE=1 SV=2 [MASS=51676]                                     | HEMO_HUMAN       | 52 kDa  | TRUE             | 10                 | 14               |
| 11 Alpha-1-acid glycoprotein 1 OS=Homo sapiens GN=ORM1 PE=1 SV=1 [MASS=23511]                  | A1AG1_HUMAN      | 24 kDa  | TRUE             | 11                 | 11               |
| 12 Haptoglobin OS=Homo sapiens GN=HP PE=1 SV=1 [MASS=45205]                                    | HPT_HUMAN        | 45 kDa  |                  | 3                  | 16               |
| 13 Apolipoprotein A-I OS=Homo sapiens GN=APOA1 PE=1 SV=1 [MASS=30778]                          | APOA1_HUMAN      | 31 kDa  |                  |                    | 18               |
| 14 Ig gamma-2 chain C region OS=Homo sapiens GN=IGHG2 PE=1 SV=2 [MASS=35900]                   | IGHG2_HUMAN      | 36 kDa  | TRUE             |                    | 9                |
| 15 Vitamin D-binding protein OS=Homo sapiens GN=GC PE=1 SV=1 [MASS=52963]                      | VTDB_HUMAN       | 53 kDa  |                  | 11                 | 5                |
| 16 Alpha-2-macroglobulin OS=Homo sapiens GN=A2M PE=1 SV=1 [MASS=163277]                        | A2MG_HUMAN       | 163 kDa | TRUE             |                    | 7                |
| 17 Ig mu chain C region OS=Homo sapiens GN=IGHM PE=1 SV=3 [MASS=49306]                         | IGHM_HUMAN       | 49 kDa  |                  |                    | 10               |
| 18 Ig gamma-3 chain C region OS=Homo sapiens GN=IGHG3 PE=1 SV=2 [MASS=41287]                   | IGHG3_HUMAN      | 41 kDa  | TRUE             | 7                  | 6                |
| 19 Lysozyme C OS=Homo sapiens GN=LYZ PE=1 SV=1 [MASS=16537]                                    | LYSC_HUMAN       | 17 kDa  |                  | 9                  |                  |
| 20 CD44 antigen OS=Homo sapiens GN=CD44 PE=1 SV=2 [MASS=81553]                                 | CD44_HUMAN       | 82 kDa  |                  | 8                  |                  |
| 21 Alpha-1B-glycoprotein OS=Homo sapiens GN=A1BG PE=1 SV=3 [MASS=54272]                        | A1BG_HUMAN       | 54 kDa  |                  | 3                  | 2                |
| 22 Ig kappa chain V-III region GOL OS=Homo sapiens PE=1 SV=1 [MASS=11830]                      | KV307_HUMAN (+5) | 12 kDa  |                  | 2                  | 6                |
| 23 Transthyretin OS=Homo sapiens GN=TTR PE=1 SV=1 [MASS=15887]                                 | TTHY_HUMAN       | 16 kDa  |                  | 8                  |                  |
| 24 Zinc-alpha-2-glycoprotein OS=Homo sapiens GN=AZGP1 PE=1 SV=1 [MASS=33872]                   | ZA2G_HUMAN       | 34 kDa  |                  | 8                  |                  |
| 25 Beta-2-microglobulin OS=Homo sapiens GN=B2M PE=1 SV=1 [MASS=13714]                          | B2MG_HUMAN       | 14 kDa  |                  | 7                  |                  |
| 26 Alpha-1-antichymotrypsin OS=Homo sapiens GN=SERPINA3 PE=1 SV=2 [MASS=47651]                 | AACT_HUMAN       | 48 kDa  |                  | 2                  | 5                |
| 27 Ceruloplasmin OS=Homo sapiens GN=CP PE=1 SV=1 [MASS=122204]                                 | CERU_HUMAN       | 122 kDa |                  |                    | 5                |
| 28 Apolipoprotein A-II OS=Homo sapiens GN=APOA2 PE=1 SV=1 [MASS=11175]                         | APOA2_HUMAN      | 11 kDa  |                  |                    | 5                |
| 29 Ig heavy chain V-III region BRO OS=Homo sapiens PE=1 SV=1 [MASS=13227]                      | HV305_HUMAN (+1) | 13 kDa  |                  |                    | 6                |
| 30 Beta-2-glycoprotein 1 OS=Homo sapiens GN=APOH PE=1 SV=3 [MASS=38298]                        | APOH_HUMAN       | 38 kDa  |                  | 3                  |                  |
| 31 Immunoglobulin J chain OS=Homo sapiens GN=IGJ PE=1 SV=3 [MASS=15594]                        | IGJ_HUMAN        | 16 kDa  |                  |                    | 5                |
| 32 Ig alpha-2 chain C region OS=Homo sapiens GN=IGHA2 PE=1 SV=3 [MASS=36526]                   | IGHA2_HUMAN      | 37 kDa  |                  |                    | 4                |
| 33 Hemoglobin subunit beta OS=Homo sapiens GN=HBB PE=1 SV=2 [MASS=15998]                       | HBB_HUMAN (+4)   | 16 kDa  |                  |                    | 4                |
| 34 Ig kappa chain V-III region SIE OS=Homo sapiens PE=1 SV=1 [MASS=11775]                      | KV302_HUMAN (+3) | 12 kDa  | TRUE             |                    |                  |
| 35 Annexin A5 OS=Homo sapiens GN=ANXA5 PE=1 SV=2 [MASS=35937]                                  | ANXA5_HUMAN      | 36 kDa  |                  |                    | 2                |
| 36 Intercellular adhesion molecule 1 OS=Homo sapiens GN=ICAM1 PE=1 SV=2 [MASS=57825]           | ICAM1_HUMAN      | 58 kDa  |                  | 4                  |                  |
| 37 Galectin-3-binding protein OS=Homo sapiens GN=LGALS3BP PE=1 SV=1 [MASS=65331]               | LG3BP_HUMAN      | 65 kDa  |                  | 4                  |                  |
| 38 Neutrophil gelatinase-associated lipocalin OS=Homo sapiens GN=LCN2 PE=1 SV=2 [MASS=22588]   | NGAL_HUMAN       | 23 kDa  |                  | 4                  |                  |
| 39 Pulmonary surfactant-associated protein A2 OS=Homo sapiens GN=SFTPA2 PE=1 SV=1 [MASS=26182] | SFPA2_HUMAN (+1) | 26 kDa  |                  | 4                  |                  |
| 40 Ig kappa chain V-IV region Len OS=Homo sapiens PE=1 SV=2 [MASS=12640]                       | KV402_HUMAN      | 13 kDa  |                  |                    | 2                |
| 41 Antithrombin-III OS=Homo sapiens GN=SERPINC1 PE=1 SV=1 [MASS=52602]                         | ANT3_HUMAN       | 53 kDa  |                  |                    | 3                |
| 42 Epididymal secretory protein E1 OS=Homo sapiens GN=NPC2 PE=1 SV=1 [MASS=16570]              | NPC2_HUMAN       | 17 kDa  |                  | 3                  |                  |
| 43 Pulmonary surfactant-associated protein B OS=Homo sapiens GN=SFTPB PE=1 SV=3 [MASS=42117]   | PSPB_HUMAN       | 42 kDa  |                  |                    | 3                |
| 44 Ig heavy chain V-III region TIL OS=Homo sapiens PE=1 SV=1 [MASS=12356]                      | HV304_HUMAN (+1) | 12 kDa  | TRUE             |                    | 3                |
| 45 Clusterin OS=Homo sapiens GN=CLU PE=1 SV=1 [MASS=52494]                                     | CLUS_HUMAN       | 52 kDa  |                  |                    | 2                |
| 46 Cystatin-B OS=Homo sapiens GN=CSTB PE=1 SV=2 [MASS=11140]                                   | CYTB_HUMAN       | 11 kDa  |                  | 2                  |                  |
| 47 Fibrinogen beta chain OS=Homo sapiens GN=FGB PE=1 SV=2 [MASS=55928]                         | FIBB_HUMAN       | 56 kDa  | TRUE             |                    | 2                |
| 48 Ig lambda chain V-III region SH OS=Homo sapiens PE=1 SV=1 [MASS=11392]                      | LV301_HUMAN      | 11 kDa  |                  |                    | 2                |
| 49 Ig lambda chain V-III region LOI OS=Homo sapiens PE=1 SV=1 [MASS=11935]                     | LV302_HUMAN      | 12 kDa  |                  |                    | 2                |

END OF FILE

Table 2. Proteomic screen of CM from rat AEC2 treated 24h ± 50 ng/ml Annexin V, undepleted of surfactant

| Protein Name                                                                                                                 | Accession Number | MW      | Protein Grouping |         | AEC CM    |    |
|------------------------------------------------------------------------------------------------------------------------------|------------------|---------|------------------|---------|-----------|----|
|                                                                                                                              |                  |         | Ambiguity        | control | Annexin V |    |
| 1 L-lactate dehydrogenase A chain OS=Rattus norvegicus GN=Ldha PE=1 SV=1 [MASS=36450]                                        | LDHA_RAT         | 36 kDa  |                  |         | 12        | 8  |
| 2 Moesin OS=Rattus norvegicus GN=Msn PE=1 SV=3 [MASS=67738]                                                                  | MOES_RAT         | 68 kDa  |                  |         | 16        | 7  |
| 3 Uteroglobin OS=Rattus norvegicus GN=Scgb1a1 PE=1 SV=2 [MASS=10449]                                                         | UTER_RAT         | 10 kDa  |                  |         | 6         | 11 |
| 4 Actin, cytoplasmic 2 OS=Rattus norvegicus GN=Actg1 PE=1 SV=1 [MASS=41793]                                                  | ACTG_RAT (+1)    | 42 kDa  |                  |         | 12        | 11 |
| 5 Cathepsin B OS=Rattus norvegicus GN=Ctsb PE=1 SV=2 [MASS=37470]                                                            | CATB_RAT         | 37 kDa  |                  |         | 11        | 7  |
| 6 Connective tissue growth factor OS=Rattus norvegicus GN=Ctgf PE=2 SV=1 [MASS=37756]                                        | CTGF_RAT         | 38 kDa  |                  |         | 7         | 10 |
| 7 Plasminogen activator inhibitor 1 OS=Rattus norvegicus GN=Serpine1 PE=2 SV=1 [MASS=45009]                                  | PAI1_RAT         | 45 kDa  |                  |         | 10        | 4  |
| 8 SPARC OS=Rattus norvegicus GN=Sparc PE=1 SV=4 [MASS=34296]                                                                 | SPRC_RAT         | 34 kDa  |                  |         | 8         | 5  |
| 9 Clusterin OS=Rattus norvegicus GN=Clu PE=1 SV=2 [MASS=51375]                                                               | CLUS_RAT         | 51 kDa  |                  |         | 5         | 8  |
| 10 Ubiquitin OS=Rattus norvegicus GN=Rps27a PE=1 SV=1 [MASS=8565]                                                            | UBIQ_RAT         | 9 kDa   |                  |         | 7         | 5  |
| 11 Peroxiredoxin-6 OS=Rattus norvegicus GN=Prdx6 PE=1 SV=3 [MASS=24818]                                                      | PRDX6_RAT        | 25 kDa  |                  |         | 7         | 5  |
| 12 Histone H2A.J OS=Rattus norvegicus GN=H2afj PE=2 SV=1 [MASS=14045]                                                        | H2AJ_RAT (+6)    | 14 kDa  |                  |         | 6         | 5  |
| 13 Anionic trypsin-1 OS=Rattus norvegicus GN=Prss1 PE=1 SV=1 [MASS=25959]                                                    | TRY1_RAT         | 26 kDa  |                  |         | 5         |    |
| 14 14-3-3 protein zeta/delta OS=Rattus norvegicus GN=Ywhaz PE=1 SV=1 [MASS=27771]                                            | 1433Z_RAT        | 28 kDa  |                  |         | 6         | 3  |
| 15 Fructose-bisphosphate aldolase A OS=Rattus norvegicus GN=Aldoa PE=1 SV=2 [MASS=39352]                                     | ALDOA_RAT        | 39 kDa  |                  |         | 2         | 5  |
| 16 Heat shock cognate 71 kDa protein OS=Rattus norvegicus GN=Hspa8 PE=1 SV=1 [MASS=70871]                                    | HSP7C_RAT        | 71 kDa  |                  |         | 4         |    |
| 17 Cystatin-C OS=Rattus norvegicus GN=Cst3 PE=1 SV=2 [MASS=15437]                                                            | CYTC_RAT         | 15 kDa  |                  |         | 5         | 3  |
| 18 14-3-3 protein epsilon OS=Rattus norvegicus GN=Ywhae PE=1 SV=1 [MASS=29174]                                               | 1433E_RAT        | 29 kDa  |                  |         | 5         | 2  |
| 19 Serum albumin OS=Rattus norvegicus GN=Alb PE=1 SV=2 [MASS=68730]                                                          | ALBU_RAT         | 69 kDa  |                  |         | 3         |    |
| 20 Alpha-actinin-1 OS=Rattus norvegicus GN=Actn1 PE=1 SV=1 [MASS=102960]                                                     | ACTN1_RAT (+1)   | 103 kDa |                  |         | 3         | 2  |
| 21 1-phosphatidylinositol-4,5-bisphosphate phosphodiesterase epsilon-1 OS=Rattus norvegicus GN=Plce1 PE=1 SV=1 [MASS=255391] | PLCE1_RAT        | 255 kDa |                  |         |           | 2  |
| 22 Voltage-dependent N-type calcium channel subunit alpha-1B OS=Rattus norvegicus GN=Cacna1b PE=1 SV=1 [MASS=262254]         | CAC1B_RAT (+1)   | 262 kDa |                  |         | 2         |    |
| 23 Lysozyme C-1 OS=Rattus norvegicus GN=Lyz1 PE=1 SV=2 [MASS=16729]                                                          | LYSC1_RAT (+1)   | 17 kDa  |                  |         |           | 2  |
| 24 14-3-3 protein gamma OS=Rattus norvegicus GN=Ywhag PE=1 SV=2 [MASS=28302]                                                 | 1433G_RAT        | 28 kDa  |                  |         | 2         | 2  |
| 25 Profilin-1 OS=Rattus norvegicus GN=Pfn1 PE=1 SV=2 [MASS=14957]                                                            | PROF1_RAT        | 15 kDa  |                  |         | 2         | 2  |
| 26 Serum response factor-binding protein 1 OS=Rattus norvegicus GN=Srfbp1 PE=2 SV=1 [MASS=49195]                             | SRFB1_RAT        | 49 kDa  |                  |         | 3         | 2  |
| 27 SEC14-like protein 3 OS=Rattus norvegicus GN=Sec14l3 PE=1 SV=1 [MASS=46027]                                               | S14L3_RAT        | 46 kDa  |                  |         |           | 2  |
| 28 Histone H2B type 1-A OS=Rattus norvegicus GN=Hist1h2ba PE=1 SV=2 [MASS=14224]                                             | H2B1A_RAT (+1)   | 14 kDa  |                  |         | 3         |    |
| 29 Secreted frizzled-related protein 1 (Fragment) OS=Rattus norvegicus GN=Sfrp1 PE=2 SV=1 [MASS=18072]                       | SFRP1_RAT        | 18 kDa  |                  |         |           | 3  |
| 30 Histone H3.1 OS=Rattus norvegicus PE=1 SV=3 [MASS=15404]                                                                  | H31_RAT (+1)     | 15 kDa  |                  |         | 5         |    |
| 31 Leucine-rich repeat-containing protein 63 OS=Rattus norvegicus GN=Lrrc63 PE=2 SV=1 [MASS=69216]                           | LRC63_RAT        | 69 kDa  |                  |         | 5         |    |
| 32 Heat shock protein HSP 90-alpha OS=Rattus norvegicus GN=Hsp90aa1 PE=1 SV=3 [MASS=84814]                                   | H590A_RAT (+1)   | 85 kDa  |                  |         | 2         | 2  |
| 33 Lactadherin OS=Rattus norvegicus GN=Mfge8 PE=2 SV=1 [MASS=47413]                                                          | MFGM_RAT         | 47 kDa  |                  |         | 2         |    |
| 34 Tropomyosin alpha-3 chain OS=Rattus norvegicus GN=Tpm3 PE=1 SV=2 [MASS=29006]                                             | TPM3_RAT         | 29 kDa  |                  |         | 2         |    |
| 35 Carbonic anhydrase 2 OS=Rattus norvegicus GN=Ca2 PE=1 SV=2 [MASS=29114]                                                   | CAH2_RAT         | 29 kDa  |                  |         | 2         |    |
| 36 Peptidyl-prolyl cis-trans isomerase A OS=Rattus norvegicus GN=Ppia PE=1 SV=2 [MASS=17874]                                 | PPIA_RAT         | 18 kDa  |                  |         | 3         |    |
| 37 Transaldolase OS=Rattus norvegicus GN=Taldo1 PE=1 SV=2 [MASS=37460]                                                       | TALDO_RAT        | 37 kDa  |                  |         | 4         |    |
| 38 Histone H1.2 OS=Rattus norvegicus GN=Hist1h1c PE=1 SV=3 [MASS=21987]                                                      | H12_RAT          | 22 kDa  |                  |         | 4         |    |
| 39 Microtubule-associated protein 1B OS=Rattus norvegicus GN=Map1b PE=1 SV=2 [MASS=269498]                                   | MAP1B_RAT        | 270 kDa |                  |         |           | 2  |
| 40 Carboxylesterase 3 OS=Rattus norvegicus GN=Ces3 PE=1 SV=2 [MASS=62147]                                                    | CES3_RAT         | 62 kDa  |                  |         | 2         |    |
| 41 Eukaryotic translation initiation factor 5B OS=Rattus norvegicus GN=Eif5b PE=1 SV=1 [MASS=137685]                         | IF2P_RAT         | 138 kDa |                  |         |           | 2  |
| 42 Malate dehydrogenase, mitochondrial OS=Rattus norvegicus GN=Mdh2 PE=1 SV=2 [MASS=35683]                                   | MDHM_RAT         | 36 kDa  |                  |         | 2         |    |
| 43 Superoxide dismutase [Cu-Zn] OS=Rattus norvegicus GN=Sod1 PE=1 SV=2 [MASS=15912]                                          | SODC_RAT         | 16 kDa  |                  |         | 2         |    |

Note: There is large amount of surfactant present in AEC2 CM which can obscure some proteins, so the screen was repeated after detergent depletion- see Table 3.

Table 3. Proteomic screen of surfactant-depleted CM from rat AEC2 treated 24h ± 50 ng/ml Annexin

V

| Protein Name                                                                                       | Accession Number | MW      | Protein Grouping Ambiguity | AEC CM  |           |
|----------------------------------------------------------------------------------------------------|------------------|---------|----------------------------|---------|-----------|
|                                                                                                    |                  |         |                            | control | Annexin V |
| 1 L-lactate dehydrogenase A chain OS=Rattus norvegicus GN=Ldha PE=1 SV=1 [MASS=36450]              | LDHA_RAT         | 36 kDa  |                            | 15      | 14        |
| 2 Uteroglobin OS=Rattus norvegicus GN=Scgb1a1 PE=1 SV=2 [MASS=10449]                               | UTER_RAT         | 10 kDa  |                            | 11      | 18        |
| 3 Actin, cytoplasmic 2 OS=Rattus norvegicus GN=Actg1 PE=1 SV=1 [MASS=41793]                        | ACTG_RAT (+1     | 42 kDa  |                            | 14      | 13        |
| 4 Connective tissue growth factor OS=Rattus norvegicus GN=Ctgf PE=2 SV=1 [MASS=37756]              | CTGF_RAT         | 38 kDa  |                            | 15      | 14        |
| 5 Serum albumin OS=Rattus norvegicus GN=Alb PE=1 SV=2 [MASS=68730]                                 | ALBU_RAT         | 69 kDa  |                            | 4       | 5         |
| 6 Moesin OS=Rattus norvegicus GN=Msn PE=1 SV=3 [MASS=67738]                                        | MOES_RAT         | 68 kDa  | TRUE                       | 14      | 7         |
| 7 Cathepsin B OS=Rattus norvegicus GN=Ctsb PE=1 SV=2 [MASS=37470]                                  | CATB_RAT         | 37 kDa  | TRUE                       | 12      | 8         |
| 8 Clusterin OS=Rattus norvegicus GN=Clu PE=1 SV=2 [MASS=51375]                                     | CLUS_RAT         | 51 kDa  |                            | 6       | 11        |
| 9 Peroxiredoxin-6 OS=Rattus norvegicus GN=Prdx6 PE=1 SV=3 [MASS=24818]                             | PRDX6_RAT        | 25 kDa  |                            | 10      | 4         |
| 10 Plasminogen activator inhibitor 1 OS=Rattus norvegicus GN=Serpine1 PE=2 SV=1 [MASS=45009]       | PAI1_RAT         | 45 kDa  |                            | 7       | 10        |
| 11 Heat shock cognate 71 kDa protein OS=Rattus norvegicus GN=Hspa8 PE=1 SV=1 [MASS=70871]          | HSP7C_RAT        | 71 kDa  | TRUE                       | 9       | 5         |
| 12 14-3-3 protein zeta/delta OS=Rattus norvegicus GN=Ywhaz PE=1 SV=1 [MASS=27771]                  | 1433Z_RAT        | 28 kDa  |                            | 9       | 4         |
| 13 SPARC OS=Rattus norvegicus GN=Sparc PE=1 SV=4 [MASS=34296]                                      | SPRC_RAT         | 34 kDa  |                            | 6       | 6         |
| 14 SEC14-like protein 3 OS=Rattus norvegicus GN=Sec14l3 PE=1 SV=1 [MASS=46027]                     | S14L3_RAT        | 46 kDa  |                            | 8       | 2         |
| 15 Histone H4 OS=Rattus norvegicus GN=Hist1h4b PE=1 SV=2 [MASS=11367]                              | H4_RAT           | 11 kDa  |                            | 6       | 2         |
| 16 Ubiquitin OS=Rattus norvegicus GN=Rps27a PE=1 SV=1 [MASS=8565]                                  | UBIQ_RAT         | 9 kDa   | TRUE                       | 4       | 3         |
| 17 Peptidyl-prolyl cis-trans isomerase A OS=Rattus norvegicus GN=Ppia PE=1 SV=2 [MASS=17874]       | PPIA_RAT         | 18 kDa  |                            | 6       | 3         |
| 18 Histone H2B type 1-A OS=Rattus norvegicus GN=Hist1h2ba PE=1 SV=2 [MASS=14224]                   | H2B1A_RAT (+     | 14 kDa  |                            | 3       | 2         |
| 19 Superoxide dismutase [Cu-Zn] OS=Rattus norvegicus GN=Sod1 PE=1 SV=2 [MASS=15912]                | SODC_RAT         | 16 kDa  |                            | 3       | 3         |
| 20 Histone H2A.J OS=Rattus norvegicus GN=H2afj PE=2 SV=1 [MASS=14045]                              | H2AJ_RAT (+7     | 14 kDa  |                            | 3       | 3         |
| 21 WAP four-disulfide core domain protein 2 OS=Rattus norvegicus GN=Wfdc2 PE=2 SV=1 [MASS=17448]   | WFDC2_RAT        | 17 kDa  |                            | 4       | 3         |
| 22 Rab GDP dissociation inhibitor beta OS=Rattus norvegicus GN=Gdi2 PE=1 SV=2 [MASS=50537]         | GDIB_RAT         | 51 kDa  | TRUE                       | 5       | 2         |
| 23 14-3-3 protein epsilon OS=Rattus norvegicus GN=Ywhae PE=1 SV=1 [MASS=29174]                     | 1433E_RAT        | 29 kDa  | TRUE                       | 5       | 3         |
| 24 Annexin A5 OS=Rattus norvegicus GN=Anxa5 PE=1 SV=3 [MASS=35744]                                 | ANXA5_RAT        | 36 kDa  |                            |         | 6         |
| 25 Hemoglobin subunit beta-1 OS=Rattus norvegicus GN=Hbb PE=1 SV=3 [MASS=15979]                    | HBB1_RAT (+1     | 16 kDa  |                            | 4       | 2         |
| 26 Alpha-actinin-4 OS=Rattus norvegicus GN=Actn4 PE=1 SV=2 [MASS=104914]                           | ACTN4_RAT (+     | 105 kDa |                            | 4       |           |
| 27 Cystatin-C OS=Rattus norvegicus GN=Cst3 PE=1 SV=2 [MASS=15437]                                  | CYTC_RAT         | 15 kDa  |                            | 4       | 2         |
| 28 Profilin-1 OS=Rattus norvegicus GN=Pfn1 PE=1 SV=2 [MASS=14957]                                  | PROF1_RAT        | 15 kDa  |                            | 4       |           |
| 29 Protein S100-G OS=Rattus norvegicus GN=S100g PE=1 SV=3 [MASS=9038]                              | S100G_RAT        | 9 kDa   |                            | 4       |           |
| 30 Selenium-binding protein 1 OS=Rattus norvegicus GN=Selenbp1 PE=1 SV=1 [MASS=52532]              | SBP1_RAT         | 53 kDa  |                            | 4       |           |
| 31 Alpha-enolase OS=Rattus norvegicus GN=Eno1 PE=1 SV=4 [MASS=47128]                               | ENOA_RAT         | 47 kDa  |                            | 3       |           |
| 32 Thioredoxin OS=Rattus norvegicus GN=Txn PE=1 SV=2 [MASS=11673]                                  | THIO_RAT         | 12 kDa  |                            | 2       | 2         |
| 33 Protein disulfide-isomerase A3 OS=Rattus norvegicus GN=Pdia3 PE=1 SV=2 [MASS=56623]             | PDIA3_RAT        | 57 kDa  | TRUE                       |         | 2         |
| 34 Heat shock protein HSP 90-beta OS=Rattus norvegicus GN=Hsp90ab1 PE=1 SV=4 [MASS=83281]          | HS90B_RAT        | 83 kDa  |                            |         | 2         |
| 35 Sulfated glycoprotein 1 OS=Rattus norvegicus GN=Psap PE=1 SV=1 [MASS=61124]                     | SAP_RAT          | 61 kDa  |                            | 3       |           |
| 36 Transaldolase OS=Rattus norvegicus GN=Taldo1 PE=1 SV=2 [MASS=37460]                             | TALDO_RAT        | 37 kDa  |                            | 3       |           |
| 37 Malate dehydrogenase, cytoplasmic OS=Rattus norvegicus GN=Mdh1 PE=1 SV=3 [MASS=36483]           | MDHC_RAT         | 36 kDa  |                            | 3       |           |
| 38 Protein S100-A11 OS=Rattus norvegicus GN=S100a11 PE=3 SV=1 [MASS=11065]                         | S10AB_RAT        | 11 kDa  |                            |         | 2         |
| 39 Fructose-bisphosphate aldolase A OS=Rattus norvegicus GN=Aldoa PE=1 SV=2 [MASS=39352]           | ALDOA_RAT        | 39 kDa  |                            | 2       |           |
| 40 Rho GDP-dissociation inhibitor 1 OS=Rattus norvegicus GN=Arhgdia PE=1 SV=1 [MASS=23407]         | GDIR1_RAT        | 23 kDa  |                            | 2       |           |
| 41 Keratin, type II cytoskeletal 1 OS=Rattus norvegicus GN=Krt1 PE=2 SV=1 [MASS=64830]             | K2C1_RAT (+2     | 65 kDa  |                            | 2       |           |
| 42 Lactadherin OS=Rattus norvegicus GN=Mfge8 PE=2 SV=1 [MASS=47413]                                | MFGM_RAT         | 47 kDa  |                            | 2       |           |
| 43 Phosphatidylethanolamine-binding protein 1 OS=Rattus norvegicus GN=Pebp1 PE=1 SV=3 [MASS=20801] | PEBP1_RAT        | 21 kDa  |                            |         | 2         |
| 44 High mobility group protein B1 OS=Rattus norvegicus GN=Hmgb1 PE=1 SV=2 [MASS=24894]             | HMGB1_RAT        | 25 kDa  |                            | 2       |           |
| 45 Aspartate aminotransferase, mitochondrial OS=Rattus norvegicus GN=Got2 PE=1 SV=2 [MASS=47314]   | AATM_RAT         | 47 kDa  |                            | 2       |           |
| 46 Dihydropyrimidinase-related protein 2 OS=Rattus norvegicus GN=Dpysl2 PE=1 SV=1 [MASS=62277]     | DPYL2_RAT        | 62kD    |                            |         |           |
| 47 Malate dehydrogenase, mitochondrial OS=Rattus norvegicus GN=Mdh2 PE=1 SV=2 [MASS=35683]         | MDHM_RAT         | 36 kDa  |                            | 2       |           |
| 48 Peptidyl-prolyl cis-trans isomerase B OS=Rattus norvegicus GN=PpiB PE=2 SV=3 [MASS=23802]       | PPIB_RAT         | 24 kDa  |                            | 2       |           |

Table 4. Proteomic screen of CM from human lung fibroblast cell line CCD-8Lu after 24h  $\pm$  50 ng/ml Annexin V

| Protein Name                                                                            | Accession Number | MW      | Protein Grouping |               |
|-----------------------------------------------------------------------------------------|------------------|---------|------------------|---------------|
|                                                                                         |                  |         | Ambiguity        | fibroblast CM |
|                                                                                         |                  |         | control          | Annexin V     |
| 1 Serum albumin OS=Homo sapiens GN=ALB PE=1 SV=2 [MASS=69366]                           | ALBU_HUMAN       | 69 kDa  | 83               | 108           |
| 2 Collagen alpha-1(I) chain OS=Homo sapiens GN=COL1A1 PE=1 SV=4 [MASS=138910]           | CO1A1_HUMAN      | 139 kDa | 5                | 23            |
| 3 Alpha-2-HS-glycoprotein OS=Homo sapiens GN=AHSG PE=1 SV=1 [MASS=39324]                | FETUA_HUMAN      | 39 kDa  | 10               |               |
| 4 Lactotransferrin OS=Homo sapiens GN=LTF PE=1 SV=6 [MASS=78181]                        | TRFL_HUMAN       | 78 kDa  | 16               | 3             |
| 5 Collagen alpha-2(I) chain OS=Homo sapiens GN=COL1A2 PE=1 SV=6 [MASS=129287]           | CO1A2_HUMAN      | 129 kDa | 3                | 8             |
| 6 Decorin OS=Homo sapiens GN=DCN PE=1 SV=1 [MASS=39746]                                 | PGS2_HUMAN       | 40 kDa  | 2                | 6             |
| 7 Beta-2-microglobulin OS=Homo sapiens GN=B2M PE=1 SV=1 [MASS=13714]                    | B2MG_HUMAN       | 14 kDa  | 3                |               |
| 8 Annexin A5 OS=Homo sapiens GN=ANXA5 PE=1 SV=2 [MASS=35937]                            | ANXA5_HUMAN      | 36 kDa  |                  | 5             |
| 9 Fibronectin OS=Homo sapiens GN=FN1 PE=1 SV=3 [MASS=262605]                            | FINC_HUMAN       | 263 kDa |                  | 4             |
| 10 POTE ankyrin domain family member F OS=Homo sapiens GN=POTEF PE=1 SV=2 [MASS=121444] | POTEF_HUMAN (+7) | 121 kDa |                  | 4             |
| 11 Sulfhydryl oxidase 1 OS=Homo sapiens GN=QSOX1 PE=1 SV=3 [MASS=82577]                 | QSOX1_HUMAN      | 83 kDa  |                  | 3             |
